# Supplementary material for: Elevated Genetic Diversity in the Emerging Blueberry Pathogen Exobasidium maculosum
Source: PLOS journal article supplement (doi:10.1371/journal.pone.0132545), 2015-07-24
Supplement: S1 (10.1371/journal.pone.0132545.s001) [file journal.pone.0132545.s001]

|       |   |    |    |    |    |    |    |    |    |    |     |     |     |     |     |     |     |     |     |     |     |     |     |     |     |     |   |   |   |   |   |   |   |   |   |   |   |   |   |   |   |   |   |   |   |   |   |   |   |   |   |   |   |   |   |   |   |   |   |   |   |   |   |   |   |   |   |   |   |   |   |   |   |   |   |   |   |   |   |   |   |   |   |   |   |   |   |   |   |   |   |   |   |   |   |   |   |   |   |   |   |   |   |   |   |   |   |   |   |   |   |   |   |   |   |   |   |   |   |   |   |   |   |   |   |   |   |   |   |   |   |   |   |   |   |   |   |   |   |   |   |   |   |   |   |   |   |   |   |   |   |   |   |   |   |   |   |   |   |   |   |   |   |   |   |   |   |   |   |   |   |   |   |   |   |   |   |   |   |   |   |   |   |   |   |   |   |   |   |   |   |   |   |   |   |   |   |   |   |   |   |   |   |   |   |   |   |   |   |   |   |   |   |   |   |   |   |   |   |   |   |   |   |   |   |   |   |   |   |   |   |   |   |   |   |   |   |   |   |   |   |   |   |
|-------|---|----|----|----|----|----|----|----|----|----|-----|-----|-----|-----|-----|-----|-----|-----|-----|-----|-----|-----|-----|-----|-----|-----|---|---|---|---|---|---|---|---|---|---|---|---|---|---|---|---|---|---|---|---|---|---|---|---|---|---|---|---|---|---|---|---|---|---|---|---|---|---|---|---|---|---|---|---|---|---|---|---|---|---|---|---|---|---|---|---|---|---|---|---|---|---|---|---|---|---|---|---|---|---|---|---|---|---|---|---|---|---|---|---|---|---|---|---|---|---|---|---|---|---|---|---|---|---|---|---|---|---|---|---|---|---|---|---|---|---|---|---|---|---|---|---|---|---|---|---|---|---|---|---|---|---|---|---|---|---|---|---|---|---|---|---|---|---|---|---|---|---|---|---|---|---|---|---|---|---|---|---|---|---|---|---|---|---|---|---|---|---|---|---|---|---|---|---|---|---|---|---|---|---|---|---|---|---|---|---|---|---|---|---|---|---|---|---|---|---|---|---|---|---|---|---|---|---|---|---|---|---|---|---|---|---|---|---|---|---|---|---|---|---|---|---|---|---|---|---|---|
|       | 1 | 10 | 20 | 30 | 40 | 50 | 60 | 70 | 80 | 90 | 100 | 110 | 120 | 130 | 140 | 150 | 160 | 170 | 180 | 190 | 200 | 210 | 220 | 230 | 240 | 247 |   |   |   |   |   |   |   |   |   |   |   |   |   |   |   |   |   |   |   |   |   |   |   |   |   |   |   |   |   |   |   |   |   |   |   |   |   |   |   |   |   |   |   |   |   |   |   |   |   |   |   |   |   |   |   |   |   |   |   |   |   |   |   |   |   |   |   |   |   |   |   |   |   |   |   |   |   |   |   |   |   |   |   |   |   |   |   |   |   |   |   |   |   |   |   |   |   |   |   |   |   |   |   |   |   |   |   |   |   |   |   |   |   |   |   |   |   |   |   |   |   |   |   |   |   |   |   |   |   |   |   |   |   |   |   |   |   |   |   |   |   |   |   |   |   |   |   |   |   |   |   |   |   |   |   |   |   |   |   |   |   |   |   |   |   |   |   |   |   |   |   |   |   |   |   |   |   |   |   |   |   |   |   |   |   |   |   |   |   |   |   |   |   |   |   |   |   |   |   |   |   |   |   |   |   |   |   |   |   |   |   |   |   |   |   |   |   |
| A3-4  | D | M  | I  | T  | G  | T  | S  | O  | A  | D  | C   | A   | L   | L   | I   | I   | A   | G   | G   | T   | G   | E   | F   | E   | A   | G   | I | S | K | D | G | O | T | R | E | H | A | L | L | A | F | T | L | G | V | R | O | L | I | V | A | N | K | M | D | T | T | K | Y | S | E | D | R | F | N | E | I | I | K | E | V | S | T | F | I | K | K | V | G | Y | N | P | K | T | V | A | F | V | P | I | S | G | W | H | G | D | N | M | I | E | P | T | A | N | M | P | W | Y | K | G | W | E | K | T | K | A | G | S | T | G | K | T | L | L | E | A | I | D | A | I | D | P | P | S | R | P | T | D | K | P | L | R | L | P | L | O | D | V | Y | K | I | G | G | I | G | T | V | P | V | G | R | V | E | T | G | V | I | K | P | G | M | V | V | N | F | A | P | A | N | V | T | T | E | V | K | S | V | E | M | H | H | E | S | L | S | E | G | L | P | G | D | N | V | G | F | N | V | K | N | V | S | V | K | D | I | R | R | G | N | V | A | D | T | K | N | K | P | A | F | E | A | A | S | F | N | A | O | V | I | V | M | N | H |
| B24   | D | M  | I  | T  | G  | T  | S  | O  | A  | D  | C   | A   | L   | L   | I   | I   | A   | G   | G   | T   | G   | E   | F   | E   | A   | G   | I | S | K | D | G | O | T | R | E | H | A | L | L | A | F | T | L | G | V | R | O | L | I | V | A | N | K | M | D | T | T | K | Y | S | E | D | R | F | N | E | I | I | K | E | V | S | T | F | I | K | K | V | G | Y | N | P | K | T | V | A | F | V | P | I | S | G | W | H | G | D | N | M | I | E | P | T | A | N | M | P | W | Y | K | G | W | E | K | T | K | A | G | S | T | G | K | T | L | L | E | A | I | D | A | I | D | P | P | S | R | P | T | D | K | P | L | R | L | P | L | O | D | V | Y | K | I | G | G | I | G | T | V | P | V | G | R | V | E | T | G | V | I | K | P | G | M | V | V | N | F | A | P | A | N | V | T | T | E | V | K | S | V | E | M | H | H | E | S | L | S | E | G | L | P | G | D | N | V | G | F | N | V | K | N | V | S | V | K | D | I | R | R | G | N | V | A | D | T | K | N | K | P | A | F | E | A | A | S | F | N | A | O | V | I | V | M | N | H |
| D2-7  | D | M  | I  | T  | G  | T  | S  | O  | A  | D  | C   | A   | L   | L   | I   | I   | A   | G   | G   | T   | G   | E   | F   | E   | A   | G   | I | S | K | D | G | O | T | R | E | H | A | L | L | A | F | T | L | G | V | R | O | L | I | V | A | N | K | M | D | T | T | K | Y | S | E | D | R | F | N | E | I | I | K | E | V | S | T | F | I | K | K | V | G | Y | N | P | K | T | V | A | F | V | P | I | S | G | W | H | G | D | N | M | I | E | P | T | A | N | M | P | W | Y | K | G | W | E | K | T | K | A | G | S | T | G | K | T | L | L | E | A | I | D | A | I | D | P | P | S | R | P | T | D | K | P | L | R | L | P | L | O | D | V | Y | K | I | G | G | I | G | T | V | P | V | G | R | V | E | T | G | V | I | K | P | G | M | V | V | N | F | A | P | A | N | V | T | T | E | V | K | S | V | E | M | H | H | E | S | L | S | E | G | L | P | G | D | N | V | G | F | N | V | K | N | V | S | V | K | D | I | R | R | G | N | V | A | D | T | K | N | K | P | A | F | E | A | A | S | F | N | A | O | V | I | V | M | N | H |
| A1-2  | D | M  | I  | T  | G  | T  | S  | O  | A  | D  | C   | A   | L   | L   | I   | I   | A   | G   | G   | T   | G   | E   | F   | E   | A   | G   | I | S | K | D | G | O | T | R | E | H | A | L | L | A | F | T | L | G | V | R | O | L | I | V | A | N | K | M | D | T | T | K | Y | S | E | D | R | F | N | E | I | I | K | E | V | S | T | F | I | K | K | V | G | Y | N | P | K | T | V | A | F | V | P | I | S | G | W | H | G | D | N | M | I | E | P | T | A | N | M | P | W | Y | K | G | W | E | K | T | K | A | G | S | T | G | K | T | L | L | E | A | I | D | A | I | D | P | P | S | R | P | T | D | K | P | L | R | L | P | L | O | D | V | Y | K | I | G | G | I | G | T | V | P | V | G | R | V | E | T | G | V | I | K | P | G | M | V | V | N | F | A | P | A | N | V | T | T | E | V | K | S | V | E | M | H | H | E | S | L | S | E | G | L | P | G | D | N | V | G | F | N | V | K | N | V | S | V | K | D | I | R | R | G | N | V | A | D | T | K | N | K | P | A | F | E | A | A | S | F | N | A | O | V | I | V | M | N | H |
| A5-1  | D | M  | I  | T  | G  | T  | S  | O  | A  | D  | C   | A   | L   | L   | I   | I   | A   | G   | G   | T   | G   | E   | F   | E   | A   | G   | I | S | K | D | G | O | T | R | E | H | A | L | L | A | F | T | L | G | V | R | O | L | I | V | A | N | K | M | D | T | T | K | Y | S | E | D | R | F | N | E | I | I | K | E | V | S | T | F | I | K | K | V | G | Y | N | P | K | T | V | A | F | V | P | I | S | G | W | H | G | D | N | M | I | E | P | T | A | N | M | P | W | Y | K | G | W | E | K | T | K | A | G | S | T | G | K | T | L | L | E | A | I | D | A | I | D | P | P | S | R | P | T | D | K | P | L | R | L | P | L | O | D | V | Y | K | I | G | G | I | G | T | V | P | V | G | R | V | E | T | G | V | I | K | P | G | M | V | V | N | F | A | P | A | N | V | T | T | E | V | K | S | V | E | M | H | H | E | S | L | S | E | G | L | P | G | D | N | V | G | F | N | V | K | N | V | S | V | K | D | I | R | R | G | N | V | A | D | T | K | N | K | P | A | F | E | A | A | S | F | N | A | O | V | I | V | M | N | H |
| B2    | D | M  | I  | T  | G  | T  | S  | O  | A  | D  | C   | A   | L   | L   | I   | I   | A   | G   | G   | T   | G   | E   | F   | E   | A   | G   | I | S | K | D | G | O | T | R | E | H | A | L | L | A | F | T | L | G | V | R | O | L | I | V | A | N | K | M | D | T | T | K | Y | S | E | D | R | F | N | E | I | I | K | E | V | S | T | F | I | K | K | V | G | Y | N | P | K | T | V | A | F | V | P | I | S | G | W | H | G | D | N | M | I | E | P | T | A | N | M | P | W | Y | K | G | W | E | K | T | K | A | G | S | T | G | K | T | L | L | E | A | I | D | A | I | D | P | P | S | R | P | T | D | K | P | L | R | L | P | L | O | D | V | Y | K | I | G | G | I | G | T | V | P | V | G | R | V | E | T | G | V | I | K | P | G | M | V | V | N | F | A | P | A | N | V | T | T | E | V | K | S | V | E | M | H | H | E | S | L | S | E | G | L | P | G | D | N | V | G | F | N | V | K | N | V | S | V | K | D | I | R | R | G | N | V | A | D | T | K | N | K | P | A | F | E | A | A | S | F | N | A | O | V | I | V | M | N | H |
| C1-16 | D | M  | I  | T  | G  | T  | S  | O  | A  | D  | C   | A   | L   | L   | I   | I   | A   | G   | G   | T   | G   | E   | F   | E   | A   | G   | I | S | K | D | G | O | T | R | E | H | A | L | L | A | F | T | L | G | V | R | O | L | I | V | A | N | K | M | D | T | T | K | Y | S | E | D | R | F | N | E | I | I | K | E | V | S | T | F | I | K | K | V | G | Y | N | P | K | T | V | A | F | V | P | I | S | G | W | H | G | D | N | M | I | E | P | T | A | N | M | P | W | Y | K | G | W | E | K | T | K | A | G | S | T | G | K | T | L | L | E | A | I | D | A | I | D | P | P | S | R | P | T | D | K | P | L | R | L | P | L | O | D | V | Y | K | I | G | G | I | G | T | V | P | V | G | R | V | E | T | G | V | I | K | P | G | M | V | V | N | F | A | P | A | N | V | T | T | E | V | K | S | V | E | M | H | H | E | S | L | S | E | G | L | P | G | D | N | V | G | F | N | V | K | N | V | S | V | K | D | I | R | R | G | N | V | A | D | T | K | N | K | P | A | F | E | A | A | S | F | N | A | O | V | I | V | M | N | H |
| C1-4  | D | M  | I  | T  | G  | T  | S  | O  | A  | D  | C   | A   | L   | L   | I   | I   | A   | G   | G   | T   | G   | E   | F   | E   | A   | G   | I | S | K | D | G | O | T | R | E | H | A | L | L | A | F | T | L | G | V | R | O | L | I | V | A | N | K | M | D | T | T | K | Y | S | E | D | R | F | N | E | I | I | K | E | V | S | T | F | I | K | K | V | G | Y | N | P | K | T | V | A | F | V | P | I | S | G | W | H | G | D | N | M | I | E | P | T | A | N | M | P | W | Y | K | G | W | E | K | T | K | A | G | S | T | G | K | T | L | L | E | A | I | D | A | I | D | P | P | S | R | P | T | D | K | P | L | R | L | P | L | O | D | V | Y | K | I | G | G | I | G | T | V | P | V | G | R | V | E | T | G | V | I | K | P | G | M | V | V | N | F | A | P | A | N | V | T | T | E | V | K | S | V | E | M | H | H | E | S | L | S | E | G | L | P | G | D | N | V | G | F | N | V | K | N | V | S | V | K | D | I | R | R | G | N | V | A | D | T | K | N | K | P | A | F | E | A | A | S | F | N | A | O | V | I | V | M | N | H |
| C2-4  | D | M  | I  | T  | G  | T  | S  | O  | A  | D  | C   | A   | L   | L   | I   | I   | A   | G   | G   | T   | G   | E   | F   | E   | A   | G   | I | S | K | D | G | O | T | R | E | H | A | L | L | A | F | T | L | G | V | R | O | L | I | V | A | N | K | M | D | T | T | K | Y | S | E | D | R | F | N | E | I | I | K | E | V | S | T | F | I | K | K | V | G | Y | N | P | K | T | V | A | F | V | P | I | S | G | W | H | G | D | N | M | I | E | P | T | A | N | M | P | W | Y | K | G | W | E | K | T | K | A | G | S | T | G | K | T | L | L | E | A | I | D | A | I | D | P | P | S | R | P | T | D | K | P | L | R | L | P | L | O | D | V | Y | K | I | G | G | I | G | T | V | P | V | G | R | V | E | T | G | V | I | K | P | G | M | V | V | N | F | A | P | A | N | V | T | T | E | V | K | S | V | E | M | H | H | E | S | L | S | E | G | L | P | G | D | N | V | G | F | N | V | K | N | V | S | V | K | D | I | R | R | G | N | V | A | D | T | K | N | K | P | A | F | E | A | A | S | F | N | A | O | V | I | V | M | N | H |
| C3-2  | D | M  | I  | T  | G  | T  | S  | O  | A  | D  | C   | A   | L   | L   | I   | I   | A   | G   | G   | T   | G   | E   | F   | E   | A   | G   | I | S | K | D | G | O | T | R | E | H | A | L | L | A | F | T | L | G | V | R | O | L | I | V | A | N | K | M | D | T | T | K | Y | S | E | D | R | F | N | E | I | I | K | E | V | S | T | F | I | K | K | V | G | Y | N | P | K | T | V | A | F | V | P | I | S | G | W | H | G | D | N | M | I | E | P | T | A | N | M | P | W | Y | K | G | W | E | K | T | K | A | G | S | T | G | K | T | L | L | E | A | I | D | A | I | D | P | P | S | R | P | T | D | K | P | L | R | L | P | L | O | D | V | Y | K | I | G | G | I | G | T | V | P | V | G | R | V | E | T | G | V | I | K | P | G | M | V | V | N | F | A | P | A | N | V | T | T | E | V | K | S | V | E | M | H | H | E | S | L | S | E | G | L | P | G | D | N | V | G | F | N | V | K | N | V | S |   |   |   |   |   |   |   |   |   |   |   |   |   |   |   |   |   |   |   |   |   |   |   |   |   |   |   |   |   |   |   |   |
